# Supplementary material
Source: HighWire-hosted journal article supplement (https://www.annfammed.org/highwire/filestream/8913/field_highwire_adjunct_files/0/JongstraAFM_Supp_App.pdf)
Supplement: JongstraAFM_Supp_App.pdf [file JongstraAFM_Supp_App.pdf]

**Supplemental materials for:**

Jongstra S, van Gool WA, Moll van Charante EP, van Dalen J, Eurelings LS, Richard E, Ligthart SA. Improving prediction of dementia in primary care. *Ann Fam Med*. 2018;16(3):206-210.

**Supplemental Table 1. Risk of Dementia**

|                                           | n/N                 | OR<br>(95% CI)        | p-value | Adjusted* OR<br>(95% CI) |
|-------------------------------------------|---------------------|-----------------------|---------|--------------------------|
| ΔMMSE over 2 year <sup>1</sup>            | 57/402 <sup>5</sup> | 3.55<br>(2.5 to 5.0)  | <0.001  | 3.45<br>(2.4 to 4.9)     |
| VAT at 2 year FU <sup>2</sup>             | 97/919 <sup>5</sup> | 3.28<br>(2.4 to 4.6)  | <0.001  | 3.14<br>(2.2 to 4.4)     |
| MMSE and VAT combined <sup>4</sup> :      |                     |                       |         |                          |
| MMSE stable + perfect VAT <sup>3</sup>    | 40/1466             | 1                     | -       |                          |
| MMSE stable + imperfect VAT <sup>3</sup>  | 60/680              | 3.23<br>(2.1 to 4.9)  | <0.001  | 3.08<br>(2.0 to 4.7)     |
| MMSE decline + perfect VAT <sup>3</sup>   | 20/203              | 3.61<br>(2.1 to 6.3)  | <0.001  | 3.46<br>(2.0 to 6.1)     |
| MMSE decline + imperfect VAT <sup>3</sup> | 37/142              | 9.55<br>(5.9 to 15.4) | <0.001  | 9.14<br>(5.6 to 14.9)    |

\*Adjusted for age and educational level

<sup>1</sup> Score: ≤-2 versus ≥-1

<sup>2</sup> Score: ≤5 versus 6

<sup>3</sup> ΔMMSE stable: improved or stable score (≥-1) on the MMSE total score over 2 year; ΔMMSE decline: declining score (≤-2) on the MMSE total score over 2 year; perfect VAT: score of 6 points; imperfect VAT: score of ≤5 points

<sup>4</sup> Scores of ΔMMSE and VAT combined. Reference category is best performing group: participants with ΔMMSE≤-1 and VAT=6

<sup>5</sup> Numbers shown are from worst performing group (MMSE ≤-2 and VAT ≤5)

Abbreviations: MMSE= Mini Mental State Examination; VAT= Visual Association Test; n= number of dementia cases; N= number at risk; B= beta coefficient; OR= odds ratio; CI= confidence ratio; FU= follow-up
